# Supplementary material
Source: publisher site journal article supplement (https://www.dovepress.com/article/221897)
Supplement: Supplementary file 1 [file get_supplementary_file.php]

**Supplementary material**

**Appendix A. Calculating the weighted probability of choosing triple therapy (example)**

Consider an example where we wanted to calculate the probability of choosing triple therapy using data for 2 participants (participant A and participant B) from our prior DCE. In our prior study, we had already calculated the probability each preferred triple therapy was 75% (participant A) and 25% (participant B), based on their individual DCE results.1 We next calculated the probability that each participant, given their different DCE results, would choose each of the 64 profiles in our decision aid. Assume that from these calculations, we estimated response profile #3/64 was expected to be chosen by participant #1 20% of the time and by participant #2 only 1% of the time. The weighted average for response profile #3 would be calculated as [(0.75*0.20) + (0.25*0.01)]/(0.20 + 0.01) = 73%. This is the probability of choosing triple therapy that would be displayed to a patient whose pattern of responses to the choice tasks matched response profile #3.

**Appendix references**

1. Hazlewood GS, Bombardier C, Tomlinson G, Marshall D. A Bayesian model that jointly considers comparative effectiveness research and patients' preferences may help inform GRADE recommendations: an application to rheumatoid arthritis treatment recommendations. *J Clin Epidemiol.* 2018;93:56-65.
